# Supplementary material for: Homogeneous synthesis of SiO2@TiO2nanocomposites with controllable shell thickness and their enhanced photocatalytic activity
Source: Royal Society of Chemistry journal article supplement (doi:10.1039/c2dt32024j), 2012-11-12
Supplement: c2dt32024j.pdf [file c2dt32024j.pdf]

## Electronic Supplementary Information

### **Homogeneous synthesis of SiO<sub>2</sub>@TiO<sub>2</sub> nanocomposites with controllable shell thickness and their enhanced photocatalytic activity**

Yong Yu, Ming-Zhen Zhang, Jun Chen, and Yuan-Di Zhao\*

*Britton Chance Center for Biomedical Photonics, Wuhan National Laboratory for Optoelectronics,  
Department of Biomedical Engineering, Huazhong University of Science and Technology, Wuhan,  
HuBei 430074, P. R. China.*

## 1. Experimental Section

### 1.1 Materials

The reagents used for the synthesis of SiO<sub>2</sub>@TiO<sub>2</sub> were commercially available reagents. Tetrabutyl titanate, ethanol, acetic acid, sulfuric acid, tetraethyl orthosilicate, and Methyl Orange (MO) were purchased from Sigma-Aldrich. All the chemicals were used as received without further purification.

### 1.2 Characterization

The morphologies of all samples were observed by field-emission scanning electron microscope (SEM, JSM-6700F, JEOL, Japan). The structures of all samples were characterized with the aid of transmission electron microscope (TEM, Tecnai G20, JEOL, Japan). TEM EDX was used for the chemical analysis of samples. The composition of samples were measured by a powder X-ray diffractometer (XRD, D8 ADVANCE, Bruker, Germany) with Cu KR irradiation ( $\lambda=0.15418$  nm).

### 1.3 Synthesis of SiO<sub>2</sub>@TiO<sub>2</sub> composite

#### 1.3.1 Synthesis of SiO<sub>2</sub>

Monodispersed spherical SiO<sub>2</sub> nanoparticles were synthesized by the traditional Stöber method. Using a separatory funnel, 12 ml of ammonia was slowly fed into a reactor, in which a mixture of tetraethyl orthosilicate (10 ml) and ethanol (300 ml) had been loaded, followed by vigorous stirring for 24 h at room temperature. The precipitates were washed with ethanol, and then dried at 100 °C for 24 h.

#### 1.3.2 Synthesis of SiO<sub>2</sub>@TiO<sub>2</sub>

The esterification of acetic acid with ethanol (molar ratio = 1:1) and hydrolysis of TiO<sub>2</sub> precursor was carried out in a round-bottom flask at 25 °C with SiO<sub>2</sub> (1 g), sulfuric acid (0.3 g), and tetrabutyl titanate (5 g) under moderate stirring after ultrasonic treatment. The collected precipitate

from reaction mixture after centrifugation was washed thoroughly with ethanol and dried at 110 °C overnight. The dried powder was put into Muffle furnace with crucible. After that, the temperature of Muffle furnace was increased from room temperature to planned temperature (*e.g.*, 500 °C) in air. When the calcination temperature reached planned temperature, Muffle furnace was kept at this temperature for 3 hours. Finally, sample was placed in vacuum oven for use after cooling.

#### 1.4 Photocatalysis Measurement

MO solution (20 mg/L) was prepared in water, and 20 mL of the solution was transferred to quartz cuvettes. Control catalysts were placed in the cuvettes filled with MO solution. The quartz cuvettes were then exposed to UV light at room temperature. The decrease in absorbance of characteristic peaks of MO was measured after various reaction conditions using UV-vis absorbance spectroscopy. Absorbance measurements were recorded in the range of 200-800 nm, and the maximum absorption wavelength ( $\lambda_{\max} = 462$  nm) for Methyl Orange was used for the calibration curves and further concentration measurements. The degradation efficiency catalyzed by SiO<sub>2</sub>@TiO<sub>2</sub> was evaluated by the degradation ratio of MO which was calculated with the following formula: Decolorization =  $[(C_0 - C)/C_0] \times 100$ ; where  $C$  and  $C_0$  represent the time-dependent concentration and the initial concentration, respectively. In present study, all SiO<sub>2</sub>@TiO<sub>2</sub> samples keep the constant weight and SiO<sub>2</sub> has various contents to explore the effect of SiO<sub>2</sub> loading on photoactivity.

$$\text{SiO}_2 \text{ loading (wt\%)} = \frac{\text{SiO}_2}{\text{SiO}_2 + \text{TiO}_2} \times 100\%$$

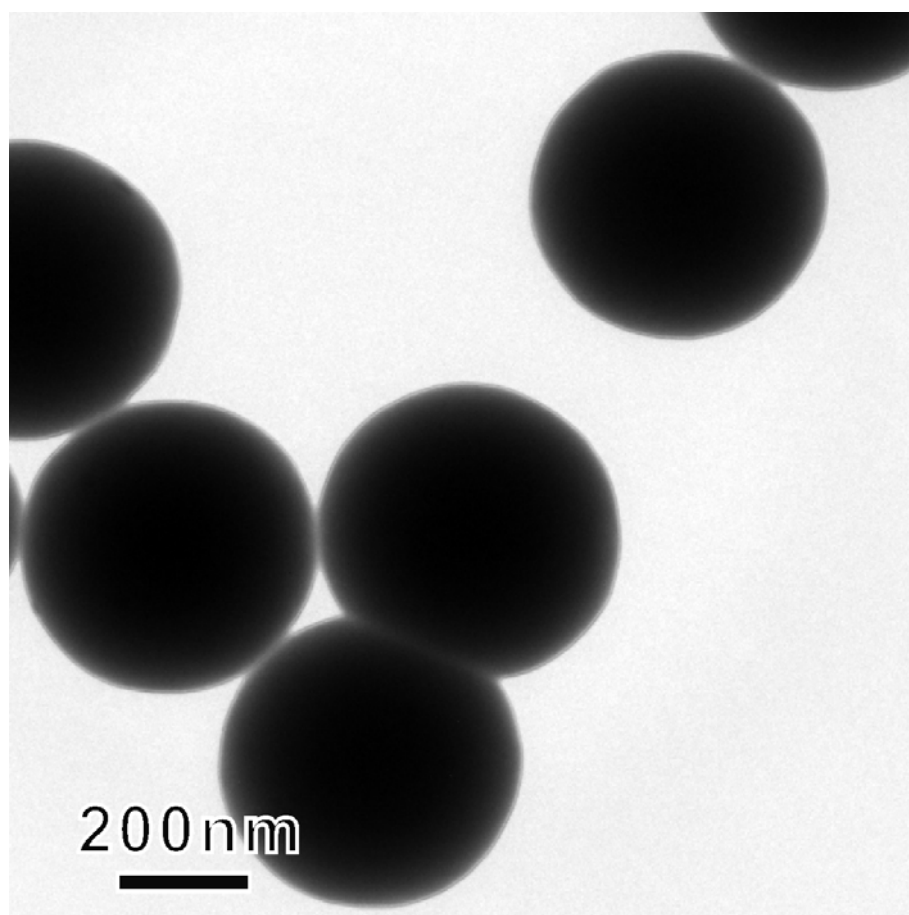

**Figure S1.** TEM image of SiO<sub>2</sub> NPs.

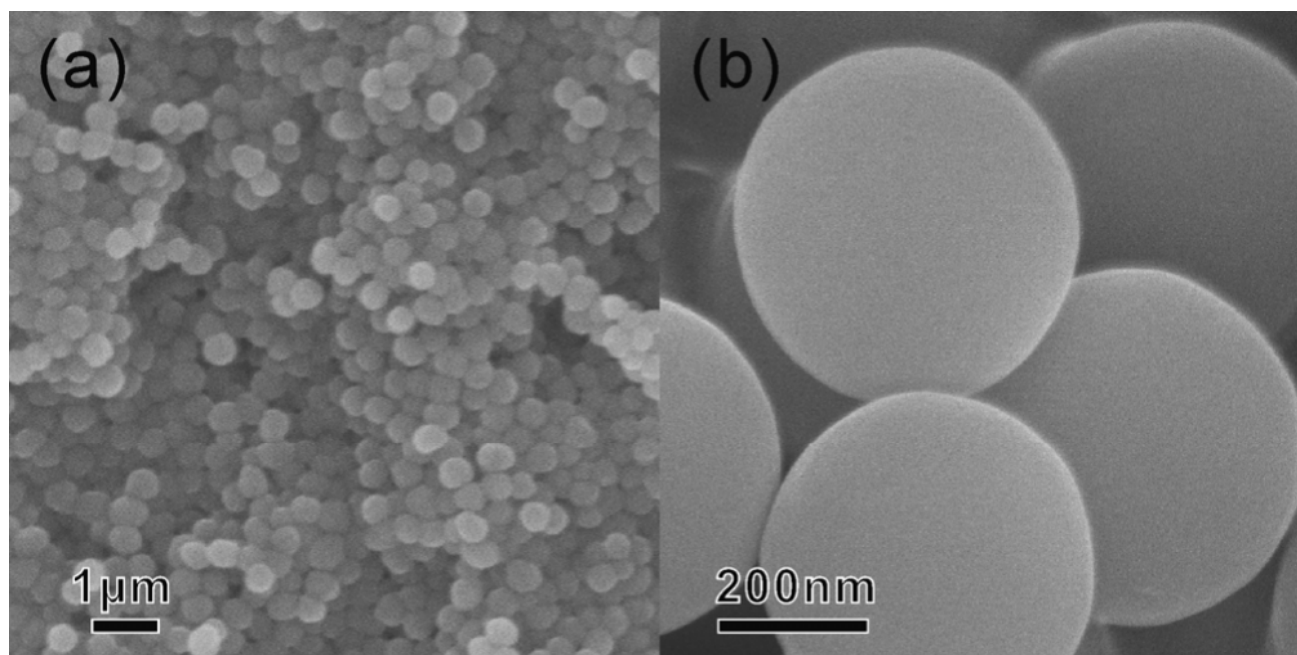

**Figure S2.** Low (a) and high (b) magnification SEM images of SiO<sub>2</sub> NPs.

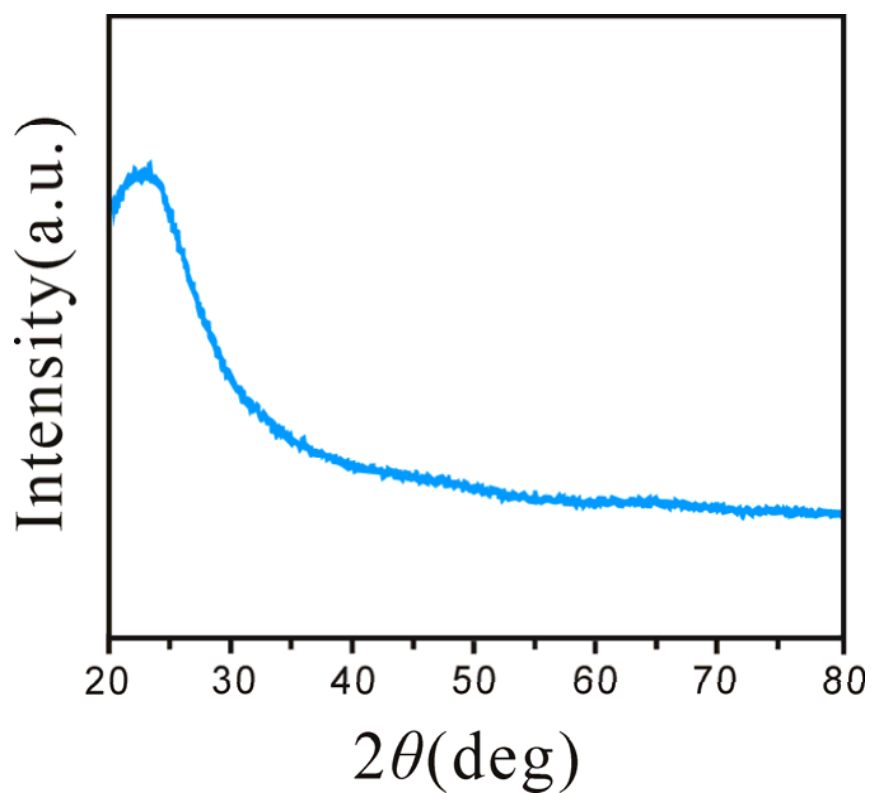

Figure S3. XRD pattern of SiO<sub>2</sub>.

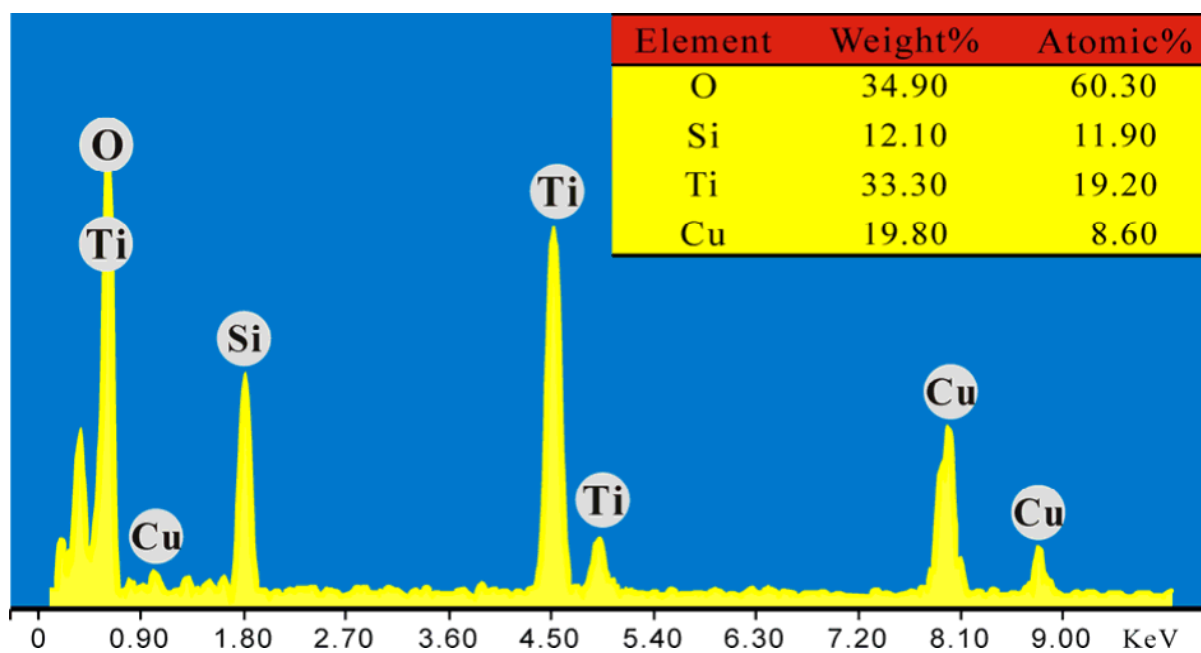

Figure S4. EDX spectrum of SiO<sub>2</sub>@TiO<sub>2</sub>.

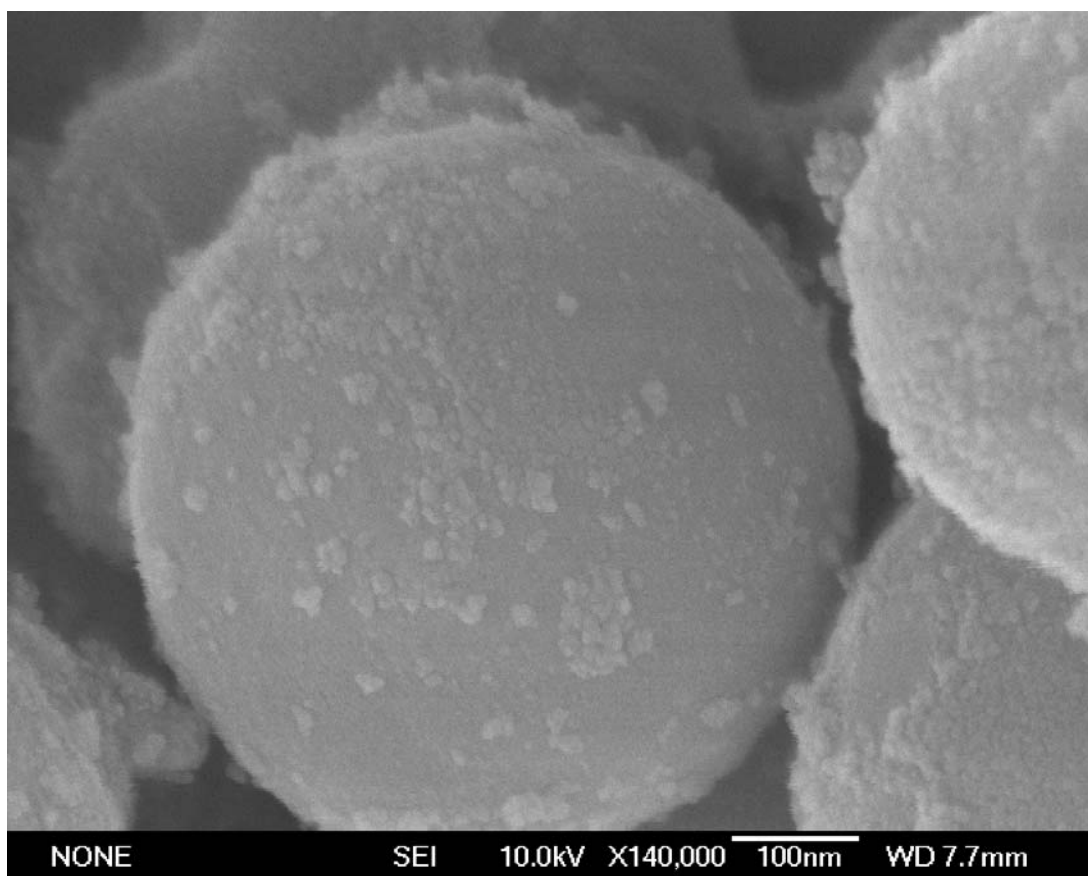

**Figure S5.** SEM images of  $\text{SiO}_2@\text{TiO}_2$  after calcination.

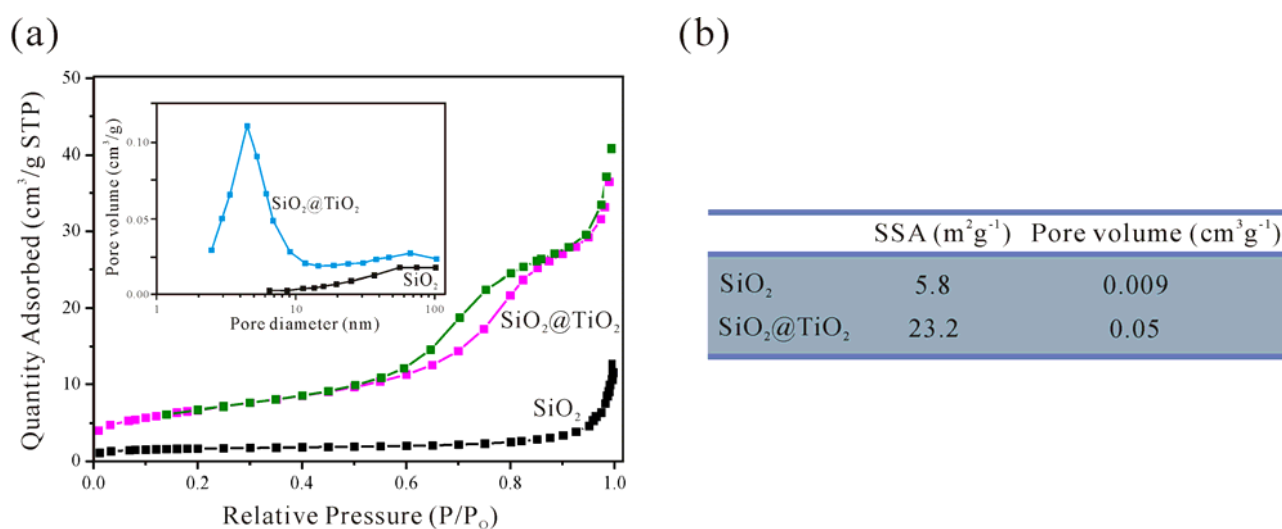

**Figure S6.** (a)  $\text{N}_2$  adsorption and desorption isotherms of  $\text{SiO}_2$  and  $\text{SiO}_2@\text{TiO}_2$ . Inset: Pore size distribution of  $\text{SiO}_2$  and  $\text{SiO}_2@\text{TiO}_2$ . (b) Textural properties of  $\text{SiO}_2$  and  $\text{SiO}_2@\text{TiO}_2$ .

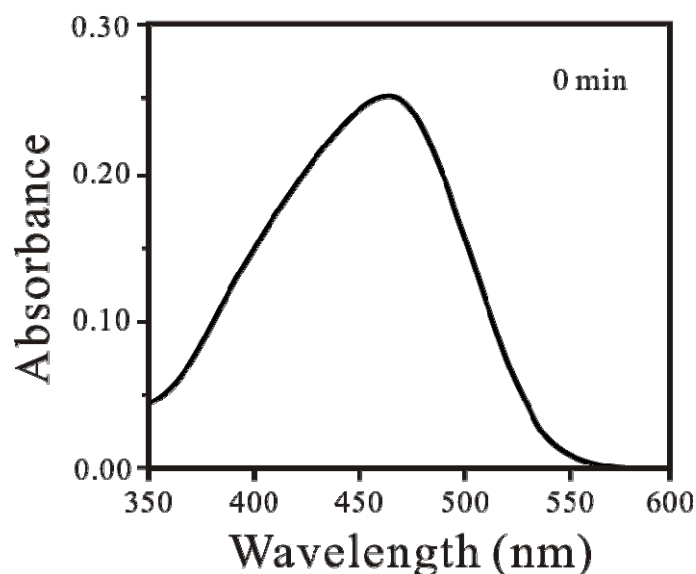

Figure S7. UV-vis absorption spectra of MO without catalyst at the beginning of experiment.

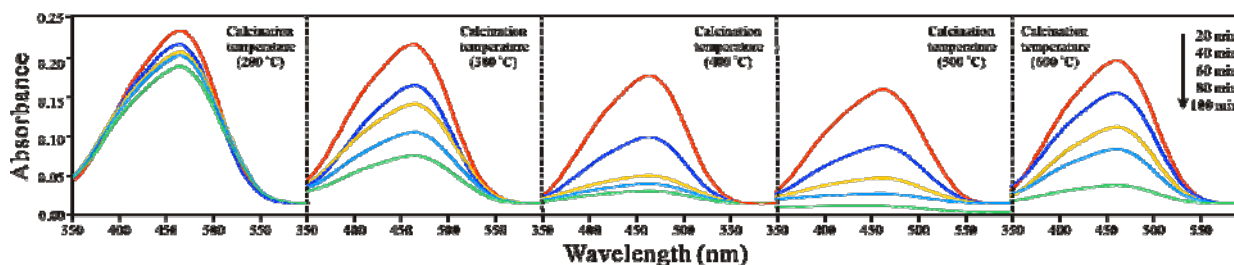

Figure S8. UV-vis absorption spectra of MO as a function of reaction time with various calcination temperatures of catalysts.

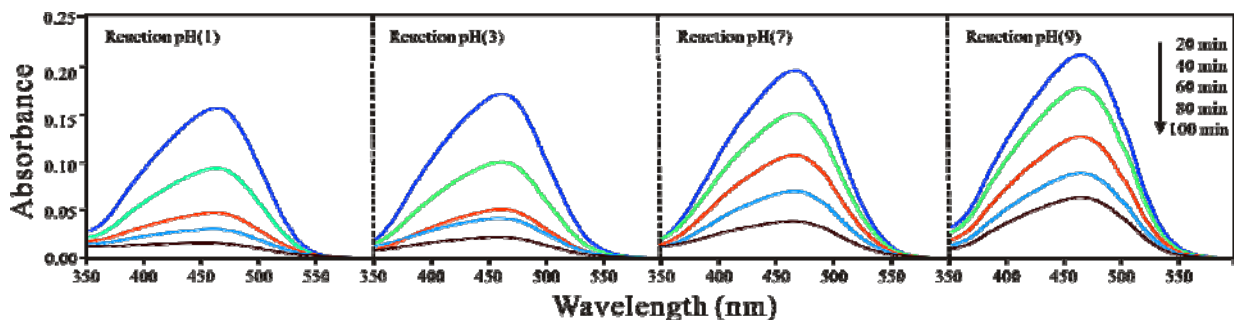

Figure S9. UV-vis absorption spectra of MO as a function of reaction time with various reaction pH.

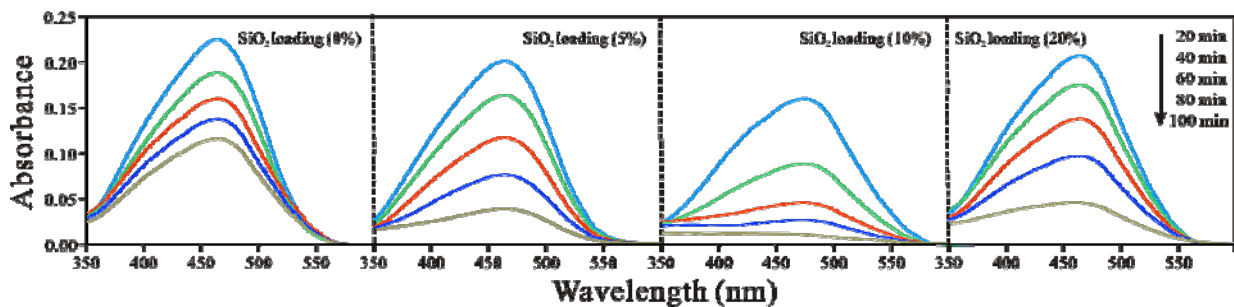

Figure S10. UV-vis absorption spectra of MO as a function of reaction time with various SiO<sub>2</sub> loading of catalysts.
